# Supplementary material for: Resource-efficient and low-power implementation of the Q-learning algorithm on FPGA
Source: PeerJ journal article supplement (doi:10.7717/peerj-cs.3351), 2026-01-16
Supplement: data_for_s8.xlsx [file data_for_s8.xlsx]

## Sheet: Run 1_ s816e
time	Actions	States
0	1	1
1	4	1
2	3	5
3	4	6
4	4	6
5	3	6
6	4	7
7	4	7
8	3	7
9	4	8
10	4	8
11	3	8
12	4	8
13	4	8
14	3	8
15	4	2
16	4	6
17	3	6
18	4	7
19	4	7
20	3	7
21	4	8
22	4	8
23	3	8
24	4	8
25	4	8
26	3	8
27	4	8
28	4	8
29	3	5
30	4	6
31	4	6
32	3	6
33	4	7
34
35	3	7
36	4	8
37
38	3	8
39	4	8
40	4	8
41	3	8
42	4	8
43	4	5
44	3	5
45	4	6
46	4	6
47	3	6
48	4	7
49	4	7
50	3	7
51	4	8
52	4	8
53	3	8
54	4	8
55	4	8
56	3	8
57	4	2
58	4	6
59	3	6
60	4	7
61	4	7
62	3	7
63	4	8
64	4	8
65	3	8
66	4	8
67	4	8
68	3	8
69	4	8
70	4	8
71	3	5
72	4	6
73	4	6
74	3	6
75	4	7
76	4	7
77	3	7
78	4	8
79	4	8
80	3	8
81	4	8
82	4	8
83	3	8
84	4	8
85	4	5
86	3	5
87	4	6
88	4	6
89	3	6
90	4	7
91	4	7
92	3	7
93	4	8
94	4	8
95	3	8
96	3	8
97	3	7
98	4	2
99	4	2
100	4	6
101	3	6
102	4	7
103	4	7
104	3	7
105	4	8
106	4	8
107	3	8
108	4	8
109	4	8
110	3	8
111	4	8
112	4	8
113	3	5
114	4	6
115	4	6
116	3	6
117	4	7
118	4	7
119	3	7
120	4	8
121	4	8
122	3	8
123	4	8
124	4	8
125	3	8
126	4	8
127	4	5
128	3	5
129	4	6
130	4	6
131	3	6
132	4	7
133	4	7
134	3	7
135	4	8
136	4	8
137	3	8
138	4	8
139	4	8
140	3	8
141	4	2
142	4	6
143	3	6
144	4	7
145	4	7
146	3	7
147	4	8
148	4	8
149	3	8
150	4	8
151	4	8
152	3	8
153	4	8
154	4	8
155	3	5
156	4	6
157	4	6
158	3	6
159	4	7
160	4	7
161	3	7
162	4	8
163	4	8
164	3	8
165	4	8
166	4	8
167	3	8
168	4	8
169	4	5
170	3	5
171	4	6
172	4	6
173	3	6
174	4	7
175	4	7
176	3	7
177	4	8
178	4	8
179	3	8
180	4	8
181	4	8
182	3	8
183	4	2
184	4	6
185	3	6
186	4	7
187	4	7
188	3	7
189	4	8
190	4	8
191	3	8
192	4	8
193	4	8
194	3	8
195	4	8
196	4	8
197	3	5
198	4	6
199	4	6
200	3	6
201	4	7
202	4	7
203	3	7
204	4	8
205	4	8
206	3	8
207	4	8
208	4	8
209	3	8
210	4	8
211	4	5
212	3	5
213	4	6
214	4	6
215	3	6
216	4	7
217	4	7
218	3	7
219	4	8
220	4	8
221	3	8
222	4	8
223	4	8
224	3	8
225	4	2
226	4	6
227	3	6
228	4	7
229	4	7
230	3	7
231	4	8
232	4	8
233	3	8
234	4	8
235	4	8
236	3	8
237	4	8
238	4	8
239	3	5
240	4	6
241	4	6
242	3	6
243	4	7
244	4	7
245	3	7
246	4	8
247	4	8
248	3	8
249	4	8
250	4	8
251	3	8
252	4	8
253	4	5
254	3	5
255	4	6
256	4	6
257	3	6
258	4	7
259	4	7
260	3	7
261	4	8
262	4	8
263	3	8
264	4	8
265	4	8
266	3	8
267	4	2
268	4	6
269	3	6
270	4	7
271	4	7
272	3	7
273	4	8
274	4	8
275	3	8
276	4	8
277	4	8
278	3	8
279	4	8
280	4	8
281	3	5
282	4	6
283	4	6
284	3	6
285	4	7
286	4	7
287	3	7
288	4	8
289	4	8
290	3	8
291	4	8
292	4	8
293	3	8
294	4	8
295	4	5
296	3	5
297	4	6
298	4	6
299	3	6
300	4	7
301	4	7
302	3	7
303	4	8
304	4	8
305	3	8
306	4	8
307	4	8
308	3	8
309	4	2
310	4	6
311	3	6
312	4	7
313	4	7
314	3	7
315	4	8
316	4	8
317	3	8
318	4	8
319	4	8
320	3	8
321	4	8
322	4	8
323	3	5
324	4	6
325	4	6
326	3	6
327	4	7
328	4	7
329	3	7
330	4	8
331	4	8
332	3	8
333	4	8
334	4	8
335	3	8
336	4	8
337	4	5
338	3	5
339	4	6
340	4	6
341	3	6
342	4	7
343	4	7
344	3	7
345	4	8
346	4	8
347	3	8
348	4	8
349	4	8
350	3	8
351	4	2
352	4	6
353	3	6
354	4	7
355	4	7
356	3	7
357	4	8
358	4	8
359	3	8
360	4	8
361	4	8
362	3	8
363	4	8
364	4	8
365	3	5
366	4	6
367	4	6
368	3	6
369	4	7
370	4	7
371	3	7
372	4	8
373	4	8
374	3	8
375	4	8
376	4	8
377	3	8
378	4	8
379	4	5
380	3	5
381	4	6
382	4	6
383	3	6
384	4	7
385	4	7
386	3	7
387	4	8
388	4	8
389	3	8
390	4	8
391	4	8
392	3	8
393	4	2
394	4	6
395	3	6
396	4	7
397	4	7
398	3	7
399	4	8
400	4	8
401	3	8
402	4	8
403	4	8
404	3	8
405	4	8
406	4	8
407	3	5
408	4	6
409	4	6
410	3	6
411	4	7
412	4	7
413	3	7
414	4	8
415	4	8
416	3	8
417	4	8
418	4	8
419	3	8
420	4	8
421	4	5
422	3	5
423	4	6
424	4	6
425	3	6
426	4	7
427	4	7
428	3	7
429	4	8
430	4	8
431	3	8
432	4	8
433	4	8
434	3	8
435	4	2
436	4	6
437	3	6
438	4	7
439	4	7
440	3	7
441	4	8
442	4	8
443	3	8
444	4	8
445	4	8
446	3	8
447	4	8
448	4	8
449	3	5
450	4	6
451	4	6
452	3	6
453	4	7
454	4	7
455	3	7
456	4	8
457	4	8
458	3	8
459	4	8
460	4	8
461	3	8
462	4	8
463	4	5
464	3	5
465	4	6
466	4	6
467	3	6
468	4	7
469	4	7
470	3	7
471	4	8
472	4	8
473	3	8
474	4	8
475	4	8
476	3	8
477	4	2
478	4	6
479	3	6
480	4	7
481	4	7
482	3	7
483	4	8
484	4	8
485	3	8
486	4	8
487	4	8
488	3	8
489	4	8
490	4	8
